## Sex-specific epidemiological and clinical characteristics of Covid-19 patients in the southeast region of Bangladesh

Md. Aminul Islam<sup>a,1</sup>, Abdullah Al Marzan<sup>b</sup>, Md. Sydul Islam<sup>c,1</sup>, Samina Sultana<sup>d</sup>, Md. Iftakhar Parvej<sup>e</sup>, Mohammad Salim Hossain<sup>f</sup>, Mohammad Tohid Amin<sup>f</sup>, Farzana Ehetasum Hossain<sup>a</sup>, Md Abdul Barek<sup>f</sup>, Md. Shafiul Hossen<sup>f</sup>, Md. Shariful Islam<sup>a</sup>, Foysal Hossen<sup>a</sup>, Newaz Mohammed Bahadur<sup>c</sup>, Md. Shahadat Hossain<sup>g</sup>, Nazratun Nayeem Choudhury<sup>h</sup>, Md. Didar-ul Alam<sup>i</sup>, Firoz Ahmed<sup>a,\*</sup>

<sup>a</sup>Department of Microbiology, Noakhali Science and Technology University, Noakhali-3814, Bangladesh

<sup>b</sup>Department of Biochemistry and Molecular Biology, Shahjalal University of Science and Technology, Sylhet-3114, Bangladesh

<sup>c</sup>Department of Applied Chemistry and Chemical Engineering, Noakhali Science and Technology University, Noakhali-3814, Bangladesh

<sup>d</sup>Department of Obstetrics & Gynaecology, President Abdul Hamid Medical College, Karimganj, Kishoreganj-2310, Bangladesh

<sup>e</sup>Department of Statistics, Noakhali Science and Technology University, Noakhali-3814, Bangladesh

<sup>f</sup>Department of Pharmacy, Noakhali Science and Technology University, Noakhali-3814, Bangladesh

<sup>g</sup>Department of Biotechnology and Genetic Engineering, Noakhali Science and Technology University, Noakhali-3814, Bangladesh

<sup>h</sup>Centre for Health, Population and Development, Independent University Bangladesh, Dhaka 1212, Bangladesh

<sup>i</sup>Professor and Honorable Vice-Chancellor, Noakhali Science and Technology University, Noakhali-3814, Bangladesh

<sup>1</sup>These authors contributed equally to this work as first authors.

**\*Corresponding Author:** Firoz Ahmed, PhD  
Professor and Chairman & Focal Point  
COVID-19 Diagnostic Lab, Department of Microbiology, Noakhali Science and Technology University, Noakhali-3814, Bangladesh  
Email: [firoz@nstu.edu.bd](mailto:firoz@nstu.edu.bd); [firoz19701016@gmail.com](mailto:firoz19701016@gmail.com)  
Mobile: +8801713195658

## Abstract

**Background:** COVID-19 has become a global pandemic with a high growth rate of confirmed cases. In Bangladesh, both mortality and affected rates are increasing at an alarming rate.

Therefore, more comprehensive studies of the epidemiological and clinical characteristics of COVID-19 are required to control this pandemic.

**Purpose:** The present study aimed to compare and analyze the sex-specific epidemiological, clinical characteristics, comorbidities, and other information of confirmed COVID-19 patients from the southeast region in Bangladesh for the first time.

**Methods:** 385 lab-confirmed cases were studied out of 2,471 tested samples between 5 June and 10 September 2020. RT-PCR was used for COVID-19 identification and SPSS (version 25) for statistical data analysis.

**Results:** We found that male patients were roughly affected compared to females patients (male 74.30% vs. female 25.7%) with an average age of  $34.86 \pm 15.442$  years, and B (+ve) blood group has been identified as a high-risk factor for COVID-19 infection. Workplace, local market, and bank were signified as sex-specific risk zone ( $p < 0.001$ ). Pre-existing medical conditions such as diabetes, hypertension, cardiovascular and respiratory diseases were identified among the patients. Less than half of the confirmed COVID-19 cases in the southeast region were asymptomatic (37.73%) and more prevalent among females than males (male vs. female: 36.84% vs. 40.51%,  $p = 0.001$ ).

**Conclusions:** The findings may help health authorities and the government take necessary steps for identification and isolation, treatment, prevention, and control of this global pandemic.

**Keywords:** COVID-19, Coronavirus disease, Epidemiological, Clinical features, Asymptomatic, Comorbidities

## 24 **1 Introduction**

25 COVID-19 (Coronavirus disease-2019) was first identified in December 2019 in a person at a  
26 seafood market in Wuhan city, in Hubei province, China (Chan et al., 2020). It is caused by an  
27 unknown pathogenic virus, and some days later, scientists isolated this new virus from the lower  
28 respiratory tract of patients. This virus is a new type of Beta coronavirus, corresponds to a  
29 comparatively noted Coronaviridae family, and is identical to Bat SARS-type coronavirus  
30 (having 88% identity) and have identity nucleotide with the actual severe acute respiratory  
31 syndrome (SARS) (80%) and Middle East respiratory syndrome coronavirus (MERS-CoV)  
32 (about 50%) epidemic virus (Zheng, 2020). The pathogen of this disease has been confirmed by  
33 molecular methods as a new coronavirus and was primarily named a 2019 novel coronavirus  
34 (2019-nCoV). World Health Organization (WHO) declared the COVID-19 outbreak as the sixth  
35 public health emergency of international concern on 30 January 2020 and declared a fresh name,  
36 called Corona Virus Disease (COVID-19) on 11 February 2020, for the pandemic disease:  
37 Corona Virus Disease (COVID-19) (Lai et al., 2020).

38  
39 On the grounds of taxonomy, phylogeny, and developed practice, the International Committee on  
40 Taxonomy of Viruses (ICTV) announced the official name of this coronavirus as severe acute  
41 respiratory syndrome coronavirus 2 (SARS-CoV-2) on 12 February 2020 (Lai et al., 2020). Since  
42 the disease's occurrence, it is become a global threat and spreading quickly to provinces in China  
43 and more than 210 countries, including Bangladesh, worldwide (Worldometers, n.d.). By 2  
44 January 2020, 41 lab-confirmed COVID-19 patients had been detected from hospitals, and less  
45 than 50% of them had the implicit illness, including high blood pressure, hyperglycemia, and  
46 cardiovascular diseases (C. Huang et al., 2020). As of 22 January 2020, there were 571 registered

47 cases of 2019-new coronaviruses (COVID-19) in 25 provinces in China and 17 deaths (Lu,  
48 2020). Now, 4636 patients died up to 22 July 2021 in China (Worldometers, n.d.).  
49  
50 COVID-19 infects more than 19.3 million patients, and about 4,147,24 (0.22%) died on 22 July  
51 2021 worldwide. USA has accounted for the highest number of COVID-19 patients  
52 (35,147,918), followed by India (31,289,115), Brazil (19,474,489), Russia (6,030,240), and the  
53 France (5,911,601) on 22 July 2021. Every country in South Asia is affected by this zoonotic  
54 virus. About 31,289,115 cases in India have been identified, one of the top five affected  
55 countries (Worldometers, n.d.). Bangladesh announced the first confirmed coronavirus cases on  
56 8 March 2020, and this number increased day by day (Anwar et al., 2020). It was reported that  
57 about 1,136,503 cases were identified, 18.498 patients died, and 961,044 patients are recovered  
58 by 22 July 2021 (Worldometers, n.d.). It is now spreading all over the country, and the highest  
59 affected area was observed in the Dhaka division. Based on district-wise case distribution,  
60 around 5546 and 2309 patients were identified, and 5058 and 2232 patients were recovered in  
61 Noakhali and Lakshmipur, respectively, on 31 December 2020 (Civil Surgeon Office, Noakhali,  
62 and Laxmipur, 2020, Corona Information, n.d.). It diffuses via people-to-people transmission, for  
63 instance, sneezing and coughing, while some research indicates the transmission chances even  
64 amongst the asymptomatic (Ningthoujam, 2020). It can also spread through stool, sweat, urine,  
65 and respiratory secretions.  
66  
67 The general incubation period of this virus is 1 to 14 days (Baud et al., 2020); however, a longer  
68 latent period has been reported in some cases, which makes it more dangerous as the host may  
69 transmit the disease to others unknowingly (Kong, 2020). The most frequently occurring

70 symptoms are fever, cough, sore throat, tiredness, ache, headache, etc. Still, severe illnesses,  
71 including- diarrhea, pneumonia, pulmonary edema, acute respiratory distress syndrome, multiple  
72 organ failure, are also found among patients (Chen et al., 2020; Y. Meng et al., 2020). Both  
73 males and females are affected by COVID-19, but several epidemiological and clinical studies  
74 suggest that males are more progressive to infection than females (Barek et al., 2020; Y. Meng et  
75 al., 2020). Many studies have already found that single or multiple comorbidities like high blood  
76 pressure, cardiovascular disease, high blood pressure, liver problem, diabetes, lung disease, and  
77 kidney disease patients are more affected by this virus (Barek et al., 2020; Emami et al., 2020).  
78 Researchers are trying to develop medicine and vaccine to combat COVID-19 and upcoming  
79 SARS and MERS viruses (Amanat and Krammer, 2020). Now, public concern and  
80 consciousness are the main prohibitions for the COVID-19 outbreak.

81  
82 At present, epidemiological, clinical characteristics, the pervasiveness of comorbidities, other  
83 information is most important to take necessary steps for treatment, prevention, and control of  
84 the current outbreak. There have no published demographic and clinical characteristics study  
85 data regarding COVID-19 patients of Bangladesh. Considering the above-mentioned facts, we  
86 analyzed 385 laboratory-confirmed COVID-19 positive patients' demographic data, clinical  
87 manifestations, medical history, blood group, travel history, previous vaccination, and other data  
88 from the southeast region in Bangladesh for the very first time, which help to proper decisions to  
89 reduce the risk of infection.

90

91

92

93 **2 Methods**

94 ***2.1 Study design and participants***

95 We selected only laboratory-confirmed Covid-19 cases between 5 June 2020 to 10 September  
96 2020 who were tested at Noakhali Science and Technology University COVID-19 testing  
97 laboratory, Noakhali, Bangladesh approved by the government (The Daily Star, 2020). The  
98 specimen was collected by nasopharyngeal swab, and reverse transcriptase-polymerase chain  
99 reaction (RT-PCR) assay was used for Covid-19 confirmation. Three hundred eighty-five  
100 patients (aged above 5 years) were identified as positive from the southeast region, Bangladesh  
101 (Noakhali and Lakshmipur) in where 286 patients were male and 99 were female. Pregnant  
102 women, children, adults, and older patients were included in this study. To avoid the chance of  
103 bias, participants were selected and listed with the help of the Noakhali Science and Technology  
104 University Covid-19 testing laboratory database.

105

106 ***2.2 Data collection***

107 The questionnaire was adopted from formerly published studies, and our research team added,  
108 modified, and developed some questions. There were various sections in the survey, including  
109 demographic information, clinical characteristics, pre-existing medical condition, blood group,  
110 earlier visited information, vaccination, etc. The investigators were told that their participation  
111 was anonymous and entirely voluntary, and there was no reward for taking part. All the  
112 participants willingly participated in this work by giving written permission. They were invited  
113 to complete the questionnaire. We were present on hand to answer questions or clarify any  
114 doubts that they might have. All filled questionnaires were collected by us one by one.

115

### 116 **2.3 Definition**

117 Patients with SARS-CoV-2 infection have no clinical signs and symptoms were defined as  
118 asymptomatic cases, and symptomatic patients were defined with SARS-CoV-2 infection  
119 presenting with clinical characteristics from medical interviews. Comorbidities were ascertained  
120 from physician documentation.

121

### 122 **2.4 Specimen collection and RT-PCR assay for SARS-CoV-2**

123 We detected the presence of SARS-CoV-2 by the qPCR method with the novel coronavirus  
124 (2019-nCoV) nucleic acid diagnostic Kit (PCR-fluorescence probing). The test utilizes the novel  
125 coronavirus (2019-nCoV) ORF 1ab and the specific conserved sequence of coding nucleocapsid  
126 protein N gene as the target regions to detect sample RNA through fluorescence signal changes.  
127 These diagnostic criteria were based on the recommendations by the Institute of Epidemiology,  
128 Disease Control and Research (IEDCR), Bangladesh. Test facility and quality reconfirmed by  
129 IEDCR.

130

### 131 **2.5 Statistical Analysis**

132 Descriptive statistics were used to summarize the data, continuous variables were expressed as  
133 mean  $\pm$ SD, and categorical variables were summarized as counts and percentages. There are  
134 several kinds of models for analyzing the relationship between the data sets. As our data are  
135 parametric, we used Pearson's Correlation Coefficient (2-tailed). All statistical analysis was  
136 conducted using the IBM Statistical Package for the Social Sciences (SPSS), version 25.0  
137 software.  $P < 0.05$  was considered statistically significant. Correlation between sex and many  
138 other factors i.e. BMI, age, comorbidities, etc., was analyzed and determined.

139 **3 Results**

140 The demographic characteristics of all the confirmed COVID-19 cases (N=385) were shown in  
141 **Table 1**. Of them, 74.3% of cases were male, and 25.7% were female, with an average age of  
142  $34.86 \pm 15.442$  years. The highest number of patients was in the age range of 21-50 years  
143 (71.91%). However, around 15% of cases were found older than them. As for Body Mass Index  
144 (BMI), 23.80% of cases were overweight, and 8.10% were obese, while only 3.40% were  
145 underweight. A (+ve), B (+ve), and O (+ve) blood groups were the most identified blood group  
146 with a percentage of 25.46%, 32.52%, and 18.40%, respectively. In the meanwhile, only a few  
147 percent of patient cases were observed with O (-ve) (3.07%), B (-ve) (3.68%), and A (-ve)  
148 (3.37%) blood group. Of the male with a positive blood group, the most common blood group  
149 was B (+ve) (35.22%), followed by A (+ve) (22.76%) and AB (+ve) (16.46%). In the female  
150 positive blood group, the most specific blood group was still B (+ve) and O (+ve) (24.05%) in  
151 each case, followed by A (+ve) (21.05%) and AB+ (15.79%) (**Figure 1**).

152  
153 About 28.50% of cases passed the higher secondary certificate (HSC) level, while only 9.40%  
154 continued their education until the secondary school certificate (SSC) level. Graduated (25.50%)  
155 and post graduated (11.75%) cases were also observed in our study. Notably, most of the  
156 COVID-19 patients were businessmen (18.80%), students (15.43%), civil servants (14.09%), and  
157 health workers (8.05%). In male cases, 23.04% were businessmen, followed by 17.83% civil  
158 servants and 8.26% health workers. However, two-thirds of the female cases (61.76%) were  
159 housewives, followed by 20.59% of students (**Figure 2**). All confirmed cases ensured that they  
160 did not travel to any other countries within the nearest time before being infected. However,  
161 most of them visited their workplace (65.95%), local market (45.39%), and health care center



162 (13.80%) within the earlier time. About 19.63% and 18.09% of cases visited the bank and  
163 relative house, respectively. Our study also explored that only 15.50% of infected persons had  
164 clear contact with confirmed cases as far as they know. Additionally, diabetes (5.19%),  
165 hypertension (5.97%), asthma (7.53%), allergy (0.52%) cancer (0.78%), pregnancy (2.34%) and  
166 others (1.29%) were the most common comorbidities identified among the confirmed cases.  
167 Most of the patients were vaccinated with BCG (86.2%), Polio (87.9%), Mumps (54%), Tetanus  
168 (82.5%). However, only a few of them were vaccinated with Hepatitis B (14.8%), Chickenpox  
169 (15.1%), and Measles (3%).

170  
171 Analysis of demographic characteristics based on gender-specific is explored in **Table 2**. This  
172 analysis showed that BMI and earlier visited places showed significant ( $p < 0.05$ ) differences  
173 between male and female patients. The highest percent of both males (74.24%) and females  
174 (68.1%) were in the age range of 21-50 years. About 88.66% male cases and 92.40% female  
175 cases had positive Rh factor ( $p = 0.115$ ). Additionally, earlier visited place such as workplace ( $p$   
176  $< 0.001$ ), bank ( $p < 0.001$ ), local market ( $p < 0.001$ ), and social gathering ( $p < 0.001$ ) were also  
177 reported as the significant risk factors for sex-specific COVID-19 infection. Among all  
178 comorbidities, our study found significant differences between males and females in the case of  
179 only chickenpox ( $p = 0.014$ ).

180  
181 Signs and symptoms identified during testing among COVID-19 confirmed cases are tabulated in  
182 **Table 3**. Our study also confirmed the sex-specific clinical characteristics of COVID-19. This  
183 present study found that less than half of the confirmed COVID-19 cases (37.73%) were  
184 symptomatic, and this asymptomatic characteristic was more prevalent among females (40.51%)

185 than that of males (36.84%) patients ( $p = 0.001$ ). Conversely, mortality cases were found higher  
186 for males than females with no significant correlation ( $p = 0.724$ ). Of the patients showing  
187 symptoms, the most frequent symptom was fever (29.45%), followed by cough (34.05%) and  
188 headache (13.50%), with no significant difference between genders. Fever and cough were  
189 observed mainly among females (55.32% and 44.87%) than male patients (44.87% and 53.85%).  
190 Also, 8.28% of cases and 13.50% of cases experienced sore throat and headache. Though very  
191 few female cases showed fever ( $p = 0.240$ ); however, about 37.82% of male cases experienced  
192 sore throat in comparison to only 25.53% of female cases ( $p = 0.204$ ).

193

#### 194 **4 Discussion**

195 The new beta coronavirus is the third type of zoonotic coronavirus, the seventh human  
196 coronavirus, and has similarities with previous coronavirus (Zhou et al., 2020; Zhu et al., 2020).  
197 This contagious virus shows the same receptor binding domain with SARS coronavirus (SARS-  
198 CoV) and MERS-CoV (Lu et al., 2020). The number of COVID-19 cases continuously rising  
199 worldwide, but no specific treatment has been confirmed to be fully effective against COVID-19  
200 (irrespective of different strains). Therefore, it is crucial to identify the clinical demographical  
201 characteristics, clinical manifestation, comorbidities, and other information of COVID-19  
202 patients. It is also important to help in the early detection and isolation of infected individuals  
203 and minimize the spread of the disease, severity, and death rate. To our best knowledge, this is  
204 the first study undertaken to investigate the demographic, clinical characteristics, comorbidities,  
205 and excrescent information of the confirmed COVID-19 patients from the southeast region in  
206 Bangladesh.

207

208 We analyzed 200 positive samples from Noakhali and 185 positive samples from Lakshmipur,  
209 the southeast region of Bangladesh. In our study, we observed that the number of male patients  
210 was largely (74.3%), almost three times higher than female patients (25.7%). Several studies  
211 conducted in China and other countries corroborated a higher number of infected males than that  
212 of females (Novel, 2020; Z. Wang et al., 2020). Meanwhile, a research study by Zhou *et al.*  
213 suggests that the expression of ACE2, the receptor for COVID-19, is higher in males than that in  
214 females, which may be the reason behind the higher proportion of COVID-19 infected males  
215 (Zhou et al., 2020). It is also thought that as females have more X chromosomes and sex  
216 hormones, these factors play an essential role in innate and adaptive immunity (Jaillon et al.,  
217 2019). On the other hand, Females are less associated with a bad lifestyle than males. Similarly,  
218 several studies found that males are more infected than females during MERS-CoV and SARS-  
219 CoV pandemic (Badawi and Ryoo, 2016; Channappanavar et al., 2017). Additionally, the  
220 average age of all cases was  $34.86 \pm 15.442$  years old and nearly similar to several studies  
221 (Azlan et al., 2020; Q. Huang et al., 2020; Kim et al., 2020). It might be due to the outgoing of  
222 middle-aged people for their respective work or for their family need as they have to meet all  
223 family and society demands. However, our study indicated that patients at a wide age range can  
224 be infected by SARS-CoV-2. This present study also demonstrated a slightly greater mean BMI  
225 value than those found in the Hubei (Yang et al., 2020) and Jiangsu (R. Huang et al., 2020)  
226 provinces of China. Notably, more than three fourth of patients involved in our study had a  
227 positive blood group, including A (+ve) (25.46%), B (+ve) (32.52%), and O (+ve) (18.40%),  
228 similar to Li *et al.* and Zietz *et al.* studies (Li et al., 2020; Zietz et al., 2020). According to one  
229 study, anti-A antibodies inhibit S protein/angiotensin-converting enzyme 2-dependent adhesion  
230 of these cells to an angiotensin-converting enzyme 2 expressing cell line (Guillon et al., 2008).

231  
232 Besides, the majority of infected cases were business professionals (18.80%), followed by  
233 students (15.43%), civil servants (14.09%), and health workers (8.05%), which is more in this  
234 study (Azlan et al., 2020; L. Wang et al., 2020). Consistent with the previous study conducted in  
235 Wuhan (D. Wang et al., 2020), this present study also explored males who are mainly visited in  
236 the workplace (82.97%,  $p < 0.001$ ) and local market (58.08%,  $p < 0.001$ ). Conversely, males  
237 need to attend their daily work for livelihood and go to the local market for their daily needs.  
238 Besides, both males (12.66%) and females (16.49%) are early visited in the health care center.  
239 Noticeably, no patients had travelled to any other country within the nearest time before getting  
240 infected, and only 15% of cases reported the known contact with confirmed cases. Of the  
241 confirmed cases, the other frequently observed comorbidities were hypertension (male vs.  
242 female: 7.29% vs. 2.06%,  $p = 0.060$ ), diabetes mellitus (male vs. female: 4.86% vs. 6.18%,  $p =$   
243 0.612), asthma (male vs. female: 8.33% vs. 5.15%,  $p = 0.306$ ), cancer (male vs. female: 0.01%  
244 vs. 1.00%,  $p = 0.745$ ) and pregnancy (female: 5.26%,  $p < 0.001$ ). However, they were observed  
245 with a lower percentage than the preceding observation in China and Italy (Colaneri et al., 2020;  
246 R. Huang et al., 2020; H. Meng et al., 2020). Maximum patients take necessary vaccines such as  
247 Polio (87.9%), BCG (86.2%), Tetanus (82.5%), Mumps (54%) were taken in life. About 37.73%  
248 of cases were asymptomatic confirmed COVID-19 cases in the southeast region ( $p = 0.001$ ).  
249 Only 5% of asymptomatic cases were observed in Beijing (Tian et al., 2020), and this  
250 asymptomatic characteristic was more prevalent among females (40.51%) than that of male  
251 (36.84%) patients ( $p = 0.001$ ), which is similar to our findings. We recorded all the identified  
252 signs and symptoms of the symptomatic cases. Out of these, the most dominant symptom was  
253 cough (34.05%), followed by fever (29.45%). Other symptoms of fatigue (21.78%), headache

254 (13.50%), sore throat (8.28%), ache (12.58%), and diarrhea (3.07%) were also found among  
255 patients. In the meanwhile, several studies conducted in Wuhan (Y. Meng et al., 2020), Shanghai  
256 (Yu et al., 2020), Beijing (Niu et al., 2020), Hubei (Yang et al., 2020), Jiangsu (R. Huang et al.,  
257 2020), and United States (Aggarwal et al., 2020) found that fever and cough as dominant clinical  
258 symptoms. However, 29.45% of our study's symptomatic patients showed comparatively higher  
259 fever than that in South Korea (11.6%) (Kim et al., 2020).

260  
261 There have been no published studies on sex-specific demographics, clinical characteristics, and  
262 comorbidity of COVID-19 infected patients, Bangladesh. This work is the first cross-sectional  
263 study and the most comprehensive assessment and robust evidence of patients clinical  
264 characteristics and comorbidities with COVID-19. Albeit this is a novel study, several limitations  
265 might be noted in the present study. Firstly, the present study was performed only in a single  
266 institution by obtaining data when patients came for coronavirus testing. Hence, the represented  
267 data does not give the whole scenario of all COVID-19 patients of the country. Secondly, the  
268 limited number of study populations, especially for female patients. Finally, we did not include  
269 any data from hospitalized patients and laboratory outputs. Further investigations are required by  
270 the use of enormous raw data and secondary COVID-19 data in the study. However, our study  
271 analyzed the demographic and clinical characteristics of COVID-19 patents that aid in  
272 identifying possible risk factors and reducing the risk of COVID-19 susceptibility to control this  
273 outbreak.

274

## 275 **5 Conclusions**

276 Nowadays, COVID-19 is a contagious disease and led to a major global health concern. Due to  
277 the dynamic nature of the pandemic, more and continuous epidemiological models are needed  
278 for forecasting and preparedness in different scenarios. In the present study, we found that males  
279 were more affected than female patients, and middle-aged people were mainly affected in both  
280 sexes. Fever, cough, and tiredness were the common symptoms found among patients, and  
281 several comorbidities (diabetes, hypertension, and asthma) were present among patients.  
282 Maximum COVID-19 patients were B (+ve), and businessmen were mostly affected by this  
283 infectious virus. We also observed that the coronavirus mainly affected male patients due to the  
284 earlier visit to the workplace, local market, and bank. As the epidemic situation in Bangladesh  
285 worsens by the day, reinforcing all of the country's mitigation measures and laws, as well as  
286 adhering to all WHO guidelines, is critical at this time to maintain the exposure probability and  
287 transmission rate as low as possible. We anticipate this study will raise the knowledge about  
288 COVID-19 and help to take effective and proper decisions to identify risk factors to control this  
289 pandemic.

290

### 291 **Funding disclosure**

292 This work was supported by the Research Cell, Noakhali Science and Technology University,  
293 Bangladesh.

294

### 295 **Ethical approval**

296 The study protocol was approved by the institutional ethical clearance committee of Noakhali  
297 Science and Technology University, Bangladesh (Approval ID: 44-2020).

298

### 299 **Acknowledgments**

300 We acknowledge the sincere help extended by several COVID-19 Diagnostic Lab Volunteers to  
301 name a few are: Md. Sahedul Islam, Md. Amzad Hossain, Mahmudul Islam Rakib, Golam

302 Shamdani, Amor Chandra Nath, and Md. Julker Nyne, of Noakhali Science and Technology  
303 University, Bangladesh.

304

### 305 **References**

306 Aggarwal S, Garcia-Telles N, Aggarwal G, Lavie C, Lippi G, Henry BM. Clinical features,  
307 laboratory characteristics, and outcomes of patients hospitalized with coronavirus disease 2019  
308 (COVID-19): Early report from the United States. *Diagnosis* 2020;7:91–6.

309 Amanat F, Krammer F. SARS-CoV-2 Vaccines: Status Report. *Immunity* 2020;52:583–9.  
310 <https://doi.org/10.1016/j.immuni.2020.03.007>.

311 Anwar S, Nasrullah M, Hosen MJ. COVID-19 and Bangladesh: Challenges and How to Address  
312 Them. *Front Public Heal* 2020;8:154. <https://doi.org/10.3389/fpubh.2020.00154>.

313 Azlan AA, Hamzah MR, Sern TJ, Ayub SH, Mohamad E. Public knowledge, attitudes and  
314 practices towards COVID-19: A cross-sectional study in Malaysia. *PLoS One* 2020;15.  
315 <https://doi.org/10.1371/journal.pone.0233668>.

316 Badawi A, Ryoo SG. Prevalence of comorbidities in the Middle East respiratory syndrome  
317 coronavirus (MERS-CoV): a systematic review and meta-analysis. *Int J Infect Dis* 2016;49:129–  
318 33.

319 Barek MA, Aziz MA, Islam MS. Impact of age, sex, comorbidities and clinical symptoms on the  
320 severity of COVID-19 cases: A meta-analysis with 55 studies and 10014 cases. *Heliyon*  
321 2020;6:e05684. <https://doi.org/10.1016/j.heliyon.2020.e05684>.

322 Baud D, Qi X, Nielsen-Saines K, Musso D, Pomar L, Favre G. Real estimates of mortality  
323 following COVID-19 infection. *Lancet Infect Dis* 2020.

324 Chan JF-W, Yuan S, Kok K-H, To KK-W, Chu H, Yang J, et al. A familial cluster of pneumonia  
325 associated with the 2019 novel coronavirus indicating person-to-person transmission: a study of  
326 a family cluster. *Lancet* 2020;395:514–23.

327 Channappanavar R, Fett C, Mack M, Ten Eyck PP, Meyerholz DK, Perlman S. Sex-based  
328 differences in susceptibility to severe acute respiratory syndrome coronavirus infection. *J*  
329 *Immunol* 2017;198:4046–53.

- 330 Chen N, Zhou M, Dong X, Qu J, Gong F, Han Y, et al. Epidemiological and clinical  
331 characteristics of 99 cases of 2019 novel coronavirus pneumonia in Wuhan, China: a descriptive  
332 study. *Lancet* 2020;395:507–13.
- 333 Civil Surgeon Office, Noakhali, and Laxmipur. 2020.
- 334 Colaneri M, Sacchi P, Zuccaro V, Biscarini S, Sachs M, Roda S, et al. Clinical characteristics of  
335 coronavirus disease (COVID-19) early findings from a teaching hospital in Pavia, North Italy, 21  
336 to 28 February 2020. *Eurosurveillance* 2020;25. [https://doi.org/10.2807/1560-](https://doi.org/10.2807/1560-7917.ES.2020.25.16.2000460)  
337 [7917.ES.2020.25.16.2000460](https://doi.org/10.2807/1560-7917.ES.2020.25.16.2000460).
- 338 Corona Information. Corona News n.d. <https://corona.gov.bd/corona-news>.
- 339 Emami A, Javanmardi F, Pirbonyeh N, Akbari A. Prevalence of Underlying Diseases in  
340 Hospitalized Patients with COVID-19: a Systematic Review and Meta-Analysis. *Arch Acad*  
341 *Emerg Med* 2020;8:e35. <https://doi.org/10.22037/aaem.v8i1.600>.
- 342 Guillon P, Clément M, Sébille V, Rivain JG, Chou CF, Ruvoën-Clouet N, et al. Inhibition of the  
343 interaction between the SARS-CoV Spike protein and its cellular receptor by anti-histo-blood  
344 group antibodies. *Glycobiology* 2008;18:1085–93. <https://doi.org/10.1093/glycob/cwn093>.
- 345 Huang C, Wang Y, Li X, Ren L, Zhao J, Hu Y, et al. Clinical features of patients infected with  
346 2019 novel coronavirus in Wuhan, China. *Lancet* 2020;395:497–506.  
347 [https://doi.org/10.1016/S0140-6736\(20\)30183-5](https://doi.org/10.1016/S0140-6736(20)30183-5).
- 348 Huang Q, Deng X, Li Y, Sun X, Chen Q, Xie M, et al. Clinical characteristics and drug therapies  
349 in patients with the common-type coronavirus disease 2019 in Hunan, China. *Int J Clin Pharm*  
350 2020:1.
- 351 Huang R, Zhu L, Xue L, Liu L, Yan X, Wang J, et al. Clinical findings of patients with  
352 coronavirus disease 2019 in Jiangsu province, China: A retrospective, multi-center study. *PLoS*  
353 *Negl Trop Dis* 2020;14:e0008280.
- 354 Jaillon S, Berthenet K, Garlanda C. Sexual dimorphism in innate immunity. *Clin Rev Allergy*  
355 *Immunol* 2019:1–14.
- 356 Kim GU, Kim MJ, Ra SH, Lee J, Bae S, Jung J, et al. Clinical characteristics of asymptomatic



- 357 and symptomatic patients with mild COVID-19. *Clin Microbiol Infect* 2020;26:948.e1-948.e3.  
358 <https://doi.org/10.1016/j.cmi.2020.04.040>.
- 359 Kong T. Longer incubation period of coronavirus disease 2019 (COVID-19) in older adults.  
360 *AGING Med* 2020;3:102–9. <https://doi.org/10.1002/agm2.12114>.
- 361 Lai C-C, Shih T-P, Ko W-C, Tang H-J, Hsueh P-R. Severe acute respiratory syndrome  
362 coronavirus 2 (SARS-CoV-2) and coronavirus disease-2019 (COVID-19): the epidemic and the  
363 challenges. *Int J Antimicrob Agents* 2020:105924.
- 364 Li J, Wang X, Chen J, Cai Y, Deng A, Yang M. Association between ABO blood groups and  
365 risk of SARS-CoV-2 pneumonia. *Br J Haematol* 2020;190:24–7.  
366 <https://doi.org/10.1111/bjh.16797>.
- 367 Lu H. Drug treatment options for the 2019-new coronavirus (2019-nCoV). *Biosci Trends*  
368 2020;14:69–71.
- 369 Lu R, Zhao X, Li J, Niu P, Yang B, Wu H, et al. Genomic characterization and epidemiology of  
370 2019 novel coronavirus: implications for virus origins and receptor binding. *Lancet*  
371 2020;395:565–74.
- 372 Meng H, Xiong R, He R, Lin W, Hao B, Zhang L, et al. CT imaging and clinical course of  
373 asymptomatic cases with COVID-19 pneumonia at admission in Wuhan, China. *J Infect*  
374 2020;81:e33–9. <https://doi.org/10.1016/j.jinf.2020.04.004>.
- 375 Meng Y, Wu P, Lu W, Liu K, Ma K, Huang L, et al. Sex-specific clinical characteristics and  
376 prognosis of coronavirus disease-19 infection in Wuhan, China: A retrospective study of 168  
377 severe patients. *PLoS Pathog* 2020;16:e1008520.
- 378 Ningthoujam R. COVID 19 can spread through breathing, talking, study estimates. *Curr Med*  
379 *Res Pract* 2020;10:132–3. <https://doi.org/10.1016/j.cmrp.2020.05.003>.
- 380 Niu S, Tian S, Lou J, Kang X, Zhang L, Lian H, et al. Clinical characteristics of older patients  
381 infected with COVID-19: A descriptive study. *Arch Gerontol Geriatr* 2020;89.  
382 <https://doi.org/10.1016/j.archger.2020.104058>.
- 383 Novel CPERE. The epidemiological characteristics of an outbreak of 2019 novel coronavirus

- 384 diseases (COVID-19) in China. *Zhonghua Liu Xing Bing Xue Za Zhi= Zhonghua*  
385 *Liuxingbingxue Zazhi* 2020;41:145.
- 386 The Daily Star. Coronavirus Test Lab Ina Noakhali Sci Technol Univ 2020.
- 387 Tian S, Hu N, Lou J, Chen K, Kang X, Xiang Z, et al. Characteristics of COVID-19 infection in  
388 Beijing. *J Infect* 2020;80:401–6. <https://doi.org/10.1016/j.jinf.2020.02.018>.
- 389 Wang D, Hu B, Hu C, Zhu F, Liu X, Zhang J, et al. Clinical characteristics of 138 hospitalized  
390 patients with 2019 novel coronavirus–infected pneumonia in Wuhan, China. *Jama*  
391 2020;323:1061–9.
- 392 Wang L, Duan Y, Zhang W, Liang J, Xu J, Zhang Y, et al. Epidemiologic and clinical  
393 characteristics of 26 cases of COVID-19 arising from patient-to-patient transmission in  
394 Liaocheng, China. *Clin Epidemiol* 2020;12:387.
- 395 Wang Z, Chen X, Lu Y, Chen F, Zhang W. Clinical characteristics and therapeutic procedure for  
396 four cases with 2019 novel coronavirus pneumonia receiving combined Chinese and Western  
397 medicine treatment. *Biosci Trends* 2020.
- 398 Worldometers. Confirmed Cases Deaths by Country, Territ or Convey n.d.  
399 <https://www.worldometers.info/coronavirus/>.
- 400 Yang K, Sheng Y, Huang C, Jin Y, Xiong N, Jiang K, et al. Clinical characteristics, outcomes,  
401 and risk factors for mortality in patients with cancer and COVID-19 in Hubei, China: a  
402 multicentre, retrospective, cohort study. *Lancet Oncol* 2020.
- 403 Yu X, Sun X, Cui P, Pan H, Lin S, Han R, et al. Epidemiological and clinical characteristics of  
404 333 confirmed cases with coronavirus disease 2019 in Shanghai, China. *Transbound Emerg Dis*  
405 2020.
- 406 Zheng J. SARS-CoV-2: an emerging coronavirus that causes a global threat. *Int J Biol Sci*  
407 2020;16:1678.
- 408 Zhou P, Yang X-L, Wang X-G, Hu B, Zhang L, Zhang W, et al. A pneumonia outbreak  
409 associated with a new coronavirus of probable bat origin. *Nature* 2020;579:270–3.
- 410 Zhu N, Zhang D, Wang W, Li X, Yang B, Song J, et al. A novel coronavirus from patients with

- 411 pneumonia in China, 2019. *N Engl J Med* 2020.
- 412 Zietz M, Zucker J, Tatonetti NP. Associations between blood type and COVID-19 infection,  
413 intubation, and death. *Nat Commun* 2020;11:1–6.
- 414

415 **Figures**

416

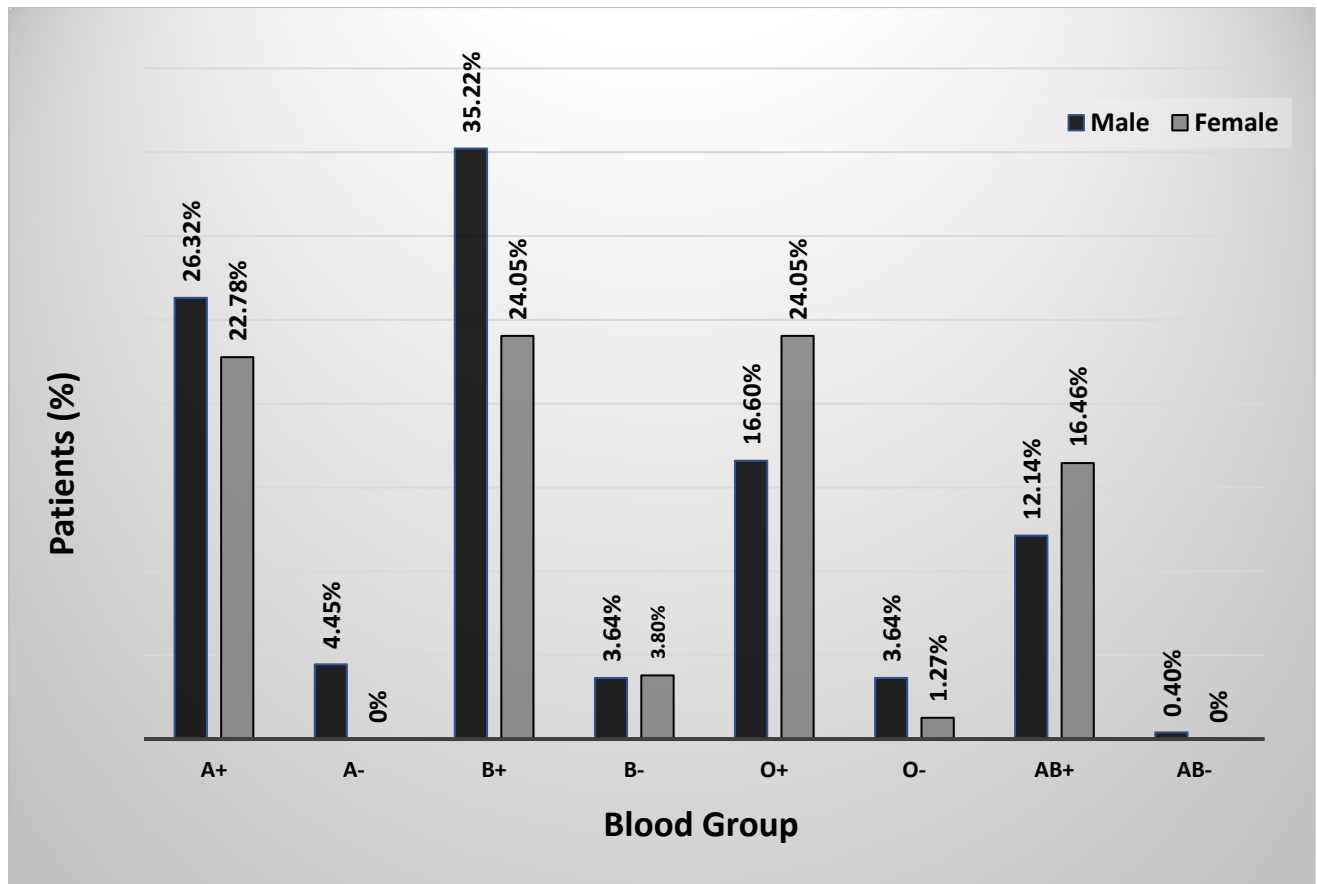

417

418 **Figure 1.** Percentage of sex-specific blood group of COVID-19 infected patients

419

420

421

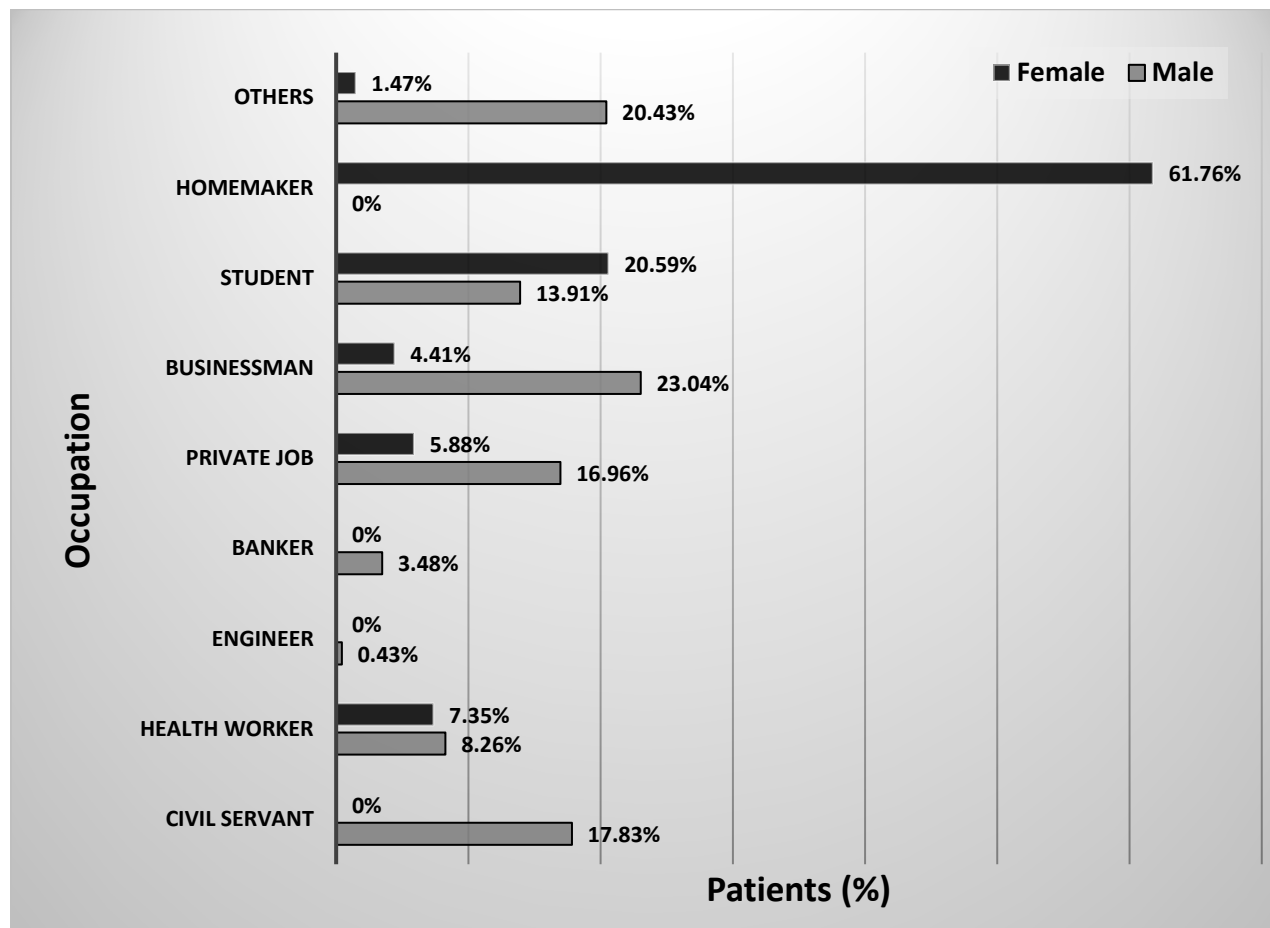

422

423

**Figure 2.** Percentage of sex-specific occupations of COVID-19 patients

424 **Tables**

425 **Table 1: Demographic characteristics of COVID-19 cases from the southeast region in**

426 **Bangladesh**

| <b>Characteristics</b>             | <b>Response</b>                                 | <b>Patients</b>                           |
|------------------------------------|-------------------------------------------------|-------------------------------------------|
| <b>Sex (N = 385)</b>               | Male                                            | 286 (74.3%)                               |
|                                    | Female                                          | 99 (25.7%)                                |
| <b>Age (years) (N=381)</b>         | Mean $\pm$ SD                                   | 34.86 $\pm$ 15.442                        |
|                                    | Age group                                       |                                           |
|                                    | 0-20                                            | 50(13.12%)                                |
|                                    | 21-50                                           | 274 (71.91%)                              |
|                                    | >51                                             | 57 (14.96%)                               |
| <b>BMI (N= 298)</b>                | Mean $\pm$ SD                                   | 24.1012 $\pm$ 4.117                       |
|                                    | BMI range                                       |                                           |
|                                    | <18.5 (Underweight)                             | 10 (3.40%)                                |
|                                    | 18.5-24.9 (Normal)                              | 193 (64.7%)                               |
|                                    | 25-29.9 (Overweight)                            | 71 (23.80%)                               |
|                                    | >30 (Obese)                                     | 24 (8.10%)                                |
| <b>Blood group (N=326)</b>         | A (+ve)                                         | 83(25.46%)                                |
|                                    | B (+ve)                                         | 106 (32.52%)                              |
|                                    | AB (+ve)                                        | 43 (13.19%)                               |
|                                    | O (+ve)                                         | 60 (18.40%)                               |
|                                    | A (-ve)                                         | 11 (3.37%)                                |
|                                    | B (-ve)                                         | 12 (3.68%)                                |
|                                    | AB (-ve)                                        | 1 (0.31%)                                 |
|                                    | O (-ve)                                         | 10 (3.07%)                                |
| <b>Educational status (N= 298)</b> | Masters                                         | 35 (11.75%)                               |
|                                    | Graduate                                        | 76 (25.50%)                               |
|                                    | Degree                                          | 8 (2.68%)                                 |
|                                    | HSC                                             | 85 (28.50%)                               |
|                                    | SSC                                             | 28 (9.40%)                                |
|                                    | Below SSC                                       | 46 (15.44%)                               |
|                                    | No education                                    | 20 (6.73%)                                |
| <b>Occupation (N=298)</b>          | Civil servant                                   | 42 (14.09%)                               |
|                                    | Health worker (doctor, nurse, sample collector) | 24 [7,8,9] (8.05%)<br>[2.68%,2.35%,3.02%] |
|                                    | Engineer                                        | 1 (0.33%)                                 |
|                                    | Banker                                          | 8 (2.68%)                                 |
|                                    | Private job                                     | 43 (14.43%)                               |

|                                             |                    |                |
|---------------------------------------------|--------------------|----------------|
|                                             | Businessmen        | 56 (18.80%)    |
|                                             | Homemaker          | 42 (14.09%)    |
|                                             | Student            | 46 (15.43%)    |
|                                             | Others             | 36 (12.08%)    |
| <b>Traveling to other countries (N=298)</b> |                    |                |
|                                             | Yes                | 6 (2.01%)      |
|                                             | No                 | 292 (97.99%)   |
| <b>Earlier visited places (N=326)</b>       |                    |                |
|                                             | Workplace          | 215 (65.95%)   |
|                                             | Bank               | 64 (19.63%)    |
|                                             | Local market       | 148 (45.39%)   |
|                                             | Relatives house    | 59 (18.09%)    |
|                                             | Social gathering   | 36 (11.04%)    |
|                                             | Health care center | 45 (13.80%)    |
| <b>Comorbidities (N= 385)</b>               |                    |                |
|                                             | Diabetes           | 20 (5.19%)     |
|                                             | Hypertension       | 23 (5.97%)     |
|                                             | Asthma             | 29(7.53%)      |
|                                             | Allergy            | 2(0.52%)       |
|                                             | Cancer             | 3(0.78%)       |
|                                             | Pregnancy          | 9 (2.34%)      |
|                                             | Others             | 5 (1.29%)      |
|                                             | No risk factors    | 296 (76.35%)   |
| <b>Vaccine in life (N=298)</b>              |                    |                |
|                                             | BCG                | 257 (86.2%)    |
|                                             | Polio              | 262 (87.9%)    |
|                                             | Hepatitis B        | 44 (14.8%)     |
|                                             | Mumps              | 161 (54.00%)   |
|                                             | Tetanus            | 246 (82.5%)    |
|                                             | Chickenpox         | 45 (15.1%)     |
|                                             | Measles            | 9 (3.00%)      |
| <b>Death Case</b>                           |                    |                |
| <b>Age (years) (N=130)</b>                  | Mean ± SD          | 62.56 ± 14.252 |
| Age group                                   | 0-20               | 1 (0.77%)      |
|                                             | 21-50              | 23 (17.70%)    |
|                                             | >51                | 106 (81.54%)   |

427

428

429 **Table 2: Sex-specific analysis of demographic characteristics of confirmed COVID-19 cases**

| Category                                                | Male         | Female      | <i>p</i> -value |
|---------------------------------------------------------|--------------|-------------|-----------------|
| <b>Age group (Years) (M=284, F= 97)</b>                 |              |             |                 |
| 0-20                                                    | 30 (10.56%)  | 20 (20.6%)  |                 |
| 21-50                                                   | 208 (73.24%) | 66 (68.1%)  | 0.275           |
| >51                                                     | 46 (16.20%)  | 11 (11.3%)  |                 |
| <b>BMI range (M=230, F= 68)</b>                         |              |             |                 |
| <18.5 (Underweight)                                     | 6 (2.61%)    | 4 (5.9%)    |                 |
| 18.5-24.9 (Normal)                                      | 152 (66.09%) | 41 (60.29%) | < 0.001*        |
| 25-29.9 (Overweight)                                    | 52 (22.60%)  | 19 (27.94%) |                 |
| >30 (Obese)                                             | 17 (8.70%)   | 4 (5.88%)   |                 |
| <b>Rh factor (M=247, F=79)</b>                          |              |             |                 |
| Positive                                                | 219 (88.66%) | 73 (92.40%) | 0.115           |
| Negative                                                | 28 (11.34%)  | 6 (7.60%)   |                 |
| <b>Traveling to other countries<br/>(M= 230, F= 68)</b> |              |             |                 |
| Yes                                                     | 5 (2.17%)    | 1 (1.47%)   | 0.769           |
| No                                                      | 225 (97.83%) | 67 (98.53%) |                 |
| <b>Earlier visited places<br/>(M=229, F=97)</b>         |              |             |                 |
| Workplace                                               | 190 (82.97%) | 25 (25.77%) | < 0.001*        |
| Bank                                                    | 55 (24.01%)  | 9 (9.28%)   | < 0.001*        |
| Local market                                            | 133 (58.08%) | 15 (15.46%) | < 0.001*        |
| Relatives house                                         | 38 (16.60%)  | 21 (21.65%) | 0.404           |
| Social gathering                                        | 34 (14.85%)  | 2 (2.06%)   | < 0.001*        |
| Health care center                                      | 29 (12.66%)  | 16 (16.49%) | 0.400           |
| <b>Comorbidities (M= 288, F=97)</b>                     |              |             |                 |
| Diabetes                                                | 14 (4.86%)   | 6 (6.18%)   | 0.612           |
| Hypertension                                            | 21 (7.29%)   | 2 (2.06%)   | 0.060           |



|                                      |              |             |          |
|--------------------------------------|--------------|-------------|----------|
| Asthma                               | 24 (8.33%)   | 5 (5.15%)   | 0.306    |
| Cancer                               | 2 (0.01%)    | 1 (1.00%)   | 0.745    |
| Pregnancy                            | ---          | 9 (9.27%)   | < 0.001* |
| Others                               | 3 (1.04%)    | 2 (2.06%)   | 0.444    |
| No risk factors                      | 224 (77.78%) | 72 (74.22%) | ---      |
| <b>Vaccine in life (M=230, F=68)</b> |              |             |          |
| BCG                                  | 81 (100.00%) | 55 (80.9%)  | 0.084    |
| Polio                                | 81 (100.00%) | 59 (86.8%)  | 0.519    |
| Hepatitis B                          | 12 (14.81%)  | 14 (20.6%)  | 0.159    |
| Mumps                                | 77 (95.06%)  | 40 (58.8%)  | 0.551    |
| Tetanus                              | 75 (92.59%)  | 54 (79.4%)  | 0.318    |
| Chickenpox                           | 1 (1.23%)    | 17 (25.00%) | 0.014**  |
| Measles                              | 7 (3.04%)    | 2 (2.94%)   | 0.928    |
| Diphtheria                           | 196 (85.22%) | 55(80.9%)   | 0.269    |

430

431

---

\* Correlation is significant at the 0.01 level (2-tailed)

\*\* Correlation is significant at the 0.05 level (2-tailed)

**Table 3: Sex-specific signs and symptoms of COVID-19 patients identified during testing**

| <b>Items</b>              | <b>Total (%)</b> | <b>Male (%)</b> | <b>Female (%)</b> | <b>p-value</b> |
|---------------------------|------------------|-----------------|-------------------|----------------|
| Asymptomatic              | 123 (37.73%)     | 91 (36.84%)     | 32 (40.51%)       | 0.001*         |
| Symptomatic               | 203 (62.27%)     | 156 (63.16%)    | 47 (59.49%)       |                |
| <b>Symptoms</b>           |                  |                 |                   |                |
| <b>(M=156, F=47)</b>      |                  |                 |                   |                |
| Fever                     | 96 (29.45%)      | 70 (44.87%)     | 26 (55.32%)       | 0.240          |
| Cough                     | 111 (34.05%)     | 84 (53.85%)     | 27 (57.45%)       | 0.666          |
| Sore throat               | 27 (8.28%)       | 22 (14.10%)     | 5 (10.64%)        | 0.542          |
| Headache                  | 44 (13.50%)      | 34 (21.79%)     | 10 (21.27%)       | 0.817          |
| Tiredness                 | 71 (21.78%)      | 59 (37.82%)     | 12 (25.53%)       | 0.204          |
| Ache                      | 41 (12.58%)      | 28 (17.95%)     | 13 (27.66%)       | 0.080          |
| Diarrhea                  | 10 (3.07%)       | 7 (4.48%)       | 3 (6.38%)         | 0.601          |
| <b>Death significance</b> |                  |                 |                   |                |
| <b>(M=108, F=22)</b>      |                  |                 |                   |                |
| <b>Age (years)</b>        |                  |                 |                   |                |
| 0-20                      | 1 (0.77%)        | 1 (0.93%)       | 0 (0.00%)         |                |
| 21-50                     | 23 (17.70%)      | 17 (15.70%)     | 6 (27.27%)        | 0.724          |
| >50                       | 1 (0.77%)        | 90 (83.33%)     | 16 (72.72%)       |                |

\*Correlation is significant at the 0.01 level (2-tailed)
